# Supplementary material
Source: PubMed Central journal article supplement (PMC4445621)
Supplement: mt2014222x2.pdf [file mt2014222x2.pdf]

# Supplementary Figure 2

**a**

| Days    | →D0     | D1                 | D2 | D3 | D4 | D5 | D6 | D7                           | D8 | D9 | D10       | D11 | D12 | D13 | D14→D20 | D21 |
|---------|---------|--------------------|----|----|----|----|----|------------------------------|----|----|-----------|-----|-----|-----|---------|-----|
| Stage   | Acclim. | DSS 1.5% treatment |    |    |    |    |    |                              |    |    | Follow-up |     |     |     |         |     |
| InvColi |         |                    |    |    |    |    |    |                              |    |    |           |     |     |     |         |     |
| Blood   |         |                    |    |    |    |    |    |                              |    |    |           |     |     |     |         |     |
| Faeces  |         |                    |    |    |    |    |    |                              |    |    |           |     |     |     |         |     |
| Tissue  |         |                    |    |    |    |    |    |                              |    |    |           |     |     |     |         |     |
|         |         |                    |    |    |    |    |    | SC                           |    |    |           | MC  |     |     | WR      | EE  |
|         |         |                    |    |    |    |    |    | Disease Activity Index (DAI) |    |    |           |     |     |     |         |     |

**b**

| Weight Loss         | Stool Consistency    | Bleeding                       |
|---------------------|----------------------|--------------------------------|
| <b>0</b> = 0 - 5%   | <b>0</b> = formed    | <b>0</b> = normal color stool  |
| <b>1</b> = 5 - 10%  | <b>1</b> = mild-soft | <b>1</b> = brown color stool   |
| <b>2</b> = 10 - 15% | <b>2</b> = very soft | <b>2</b> = reddish color stool |
| <b>3</b> = 15 - 20% | <b>3</b> = watery    | <b>3</b> = bloody stool        |
| <b>4</b> ≥ 20%      |                      |                                |

**c**

| Feature                    | Score | Description |
|----------------------------|-------|-------------|
| Loss of epithelium         | 0     | None        |
|                            | 1     | 0 - 5%      |
|                            | 2     | 5 - 10%     |
|                            | 3     | > 10%       |
| Crypt elongation           | 0     | None        |
|                            | 1     | Mild        |
|                            | 2     | Moderate    |
|                            | 3     | Severe      |
| Depletion of goblet cells  | 0     | None        |
|                            | 1     | Mild        |
|                            | 2     | Moderate    |
|                            | 3     | Severe      |
| Immune system infiltration | 0     | None        |
|                            | 1     | Mild        |
|                            | 2     | Moderate    |
|                            | 3     | Severe      |

## Supplementary Figure S2

(a) Schematic representation of the experimental design. SC = start of colitis; MC = maximum of colitis; WR = weight recovery; EE = end of experiment; DSS = dextran sulfate sodium. (b) Score assignment of clinical parameters used for DAI (disease activity index) calculation on DSS-induced colitis. (c) Score values used for the measurement of the histological degree of DSS-induced colitis.
