# Supplementary material
Source: PubMed Central journal article supplement (PMC4445621)
Supplement: mt2014222x3.pdf [file mt2014222x3.pdf]

# Supplementary Figure 3a

Colon Mucosa  
(Gr. IV, DSS 1.5% + InvColi<sup>NC</sup>)

- Epithelial cell
- Granulocyte
- Monocyte/Macrophage
- Macrophage
- Lymphocyte
- Plasma cell

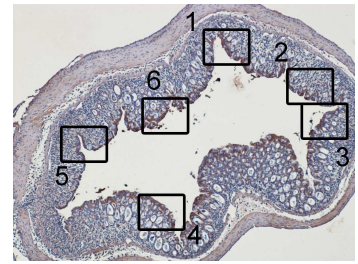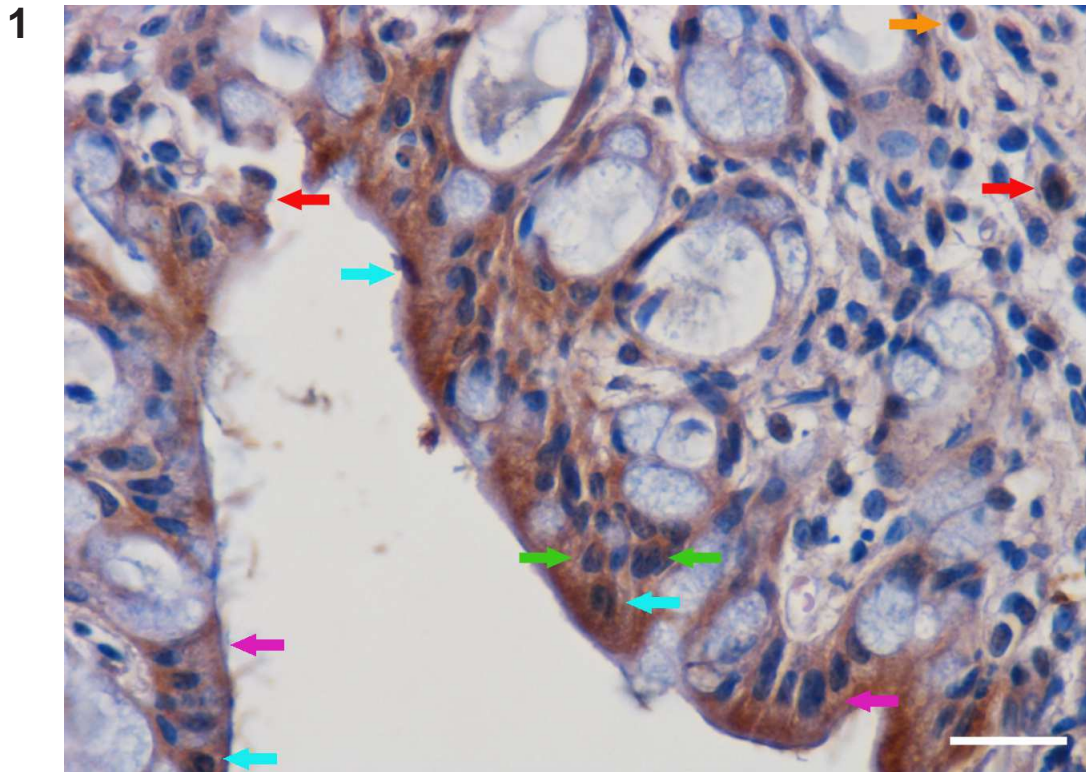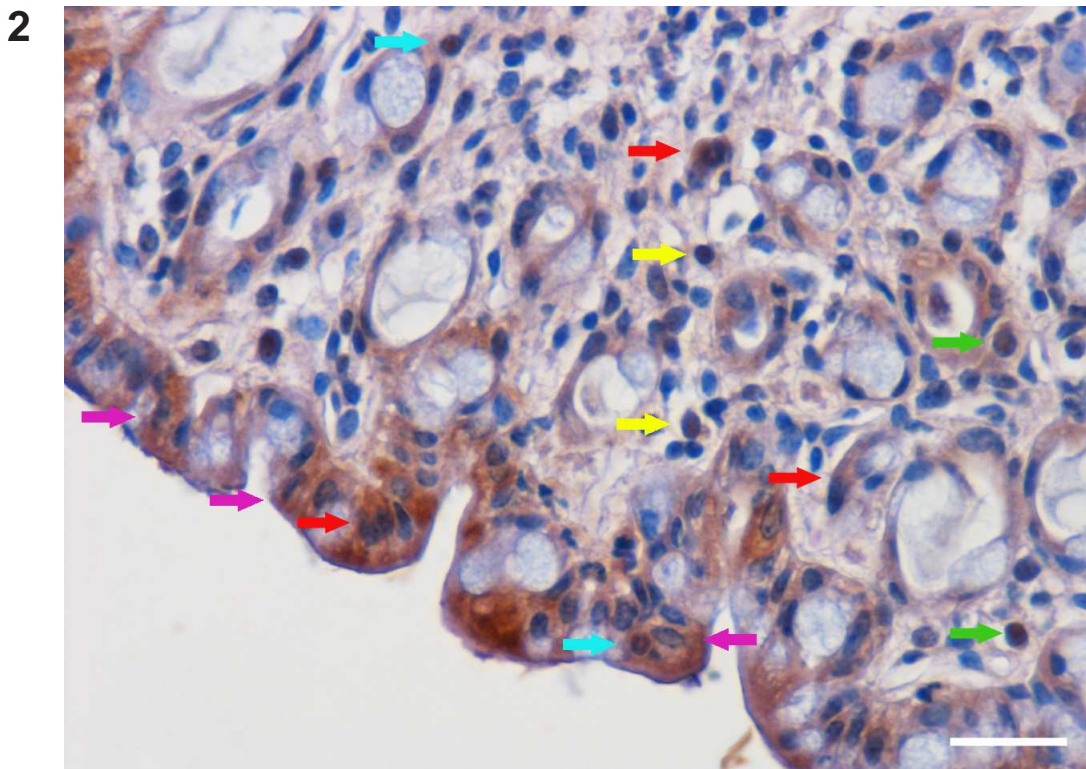



3

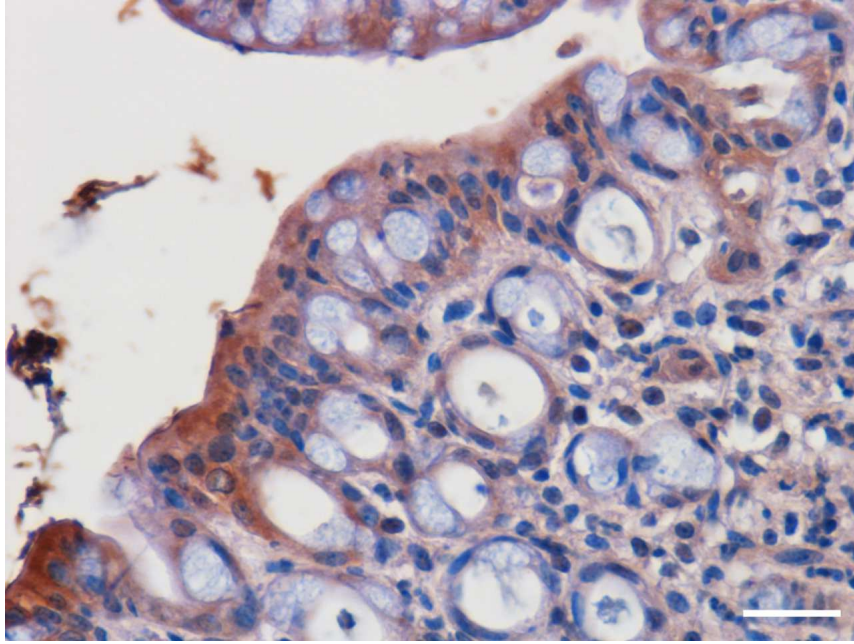

4

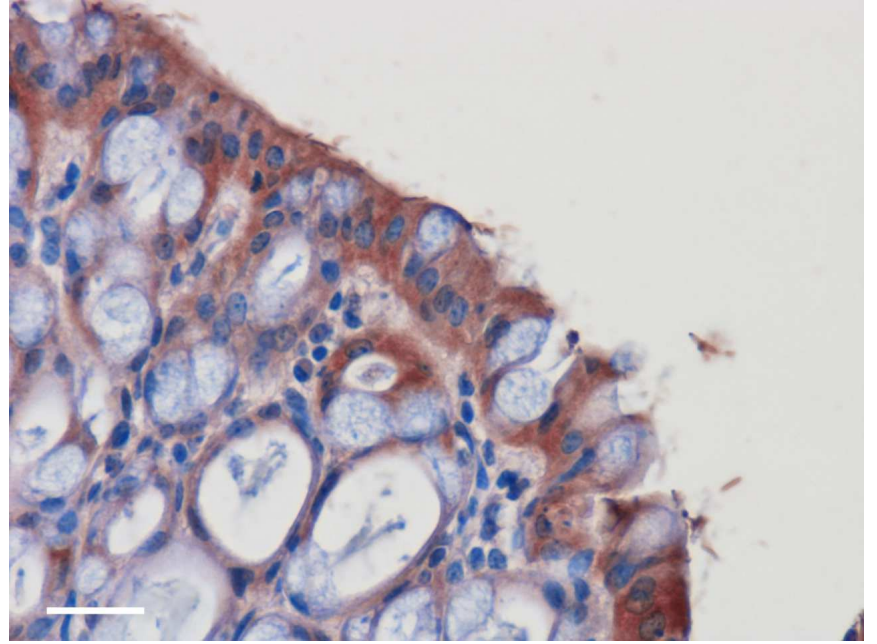

5

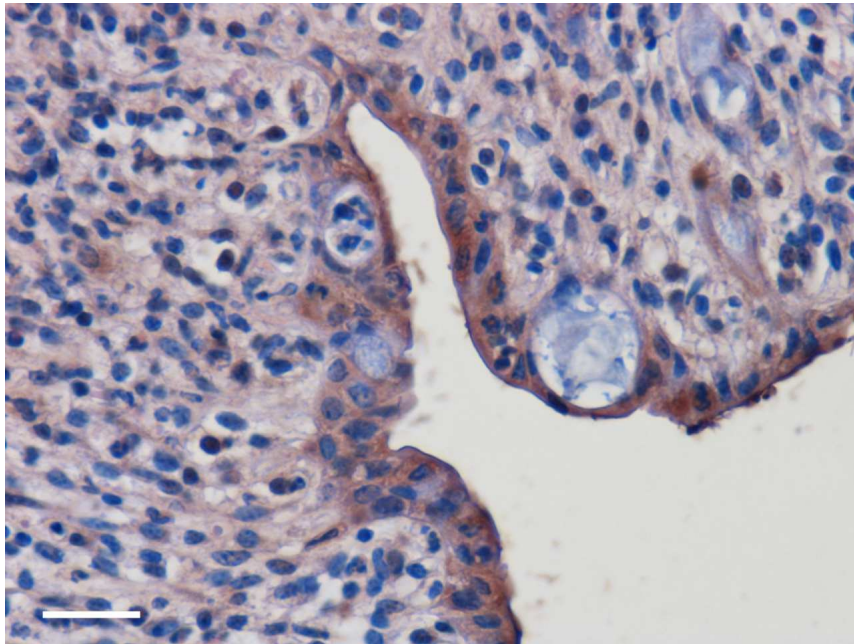

6

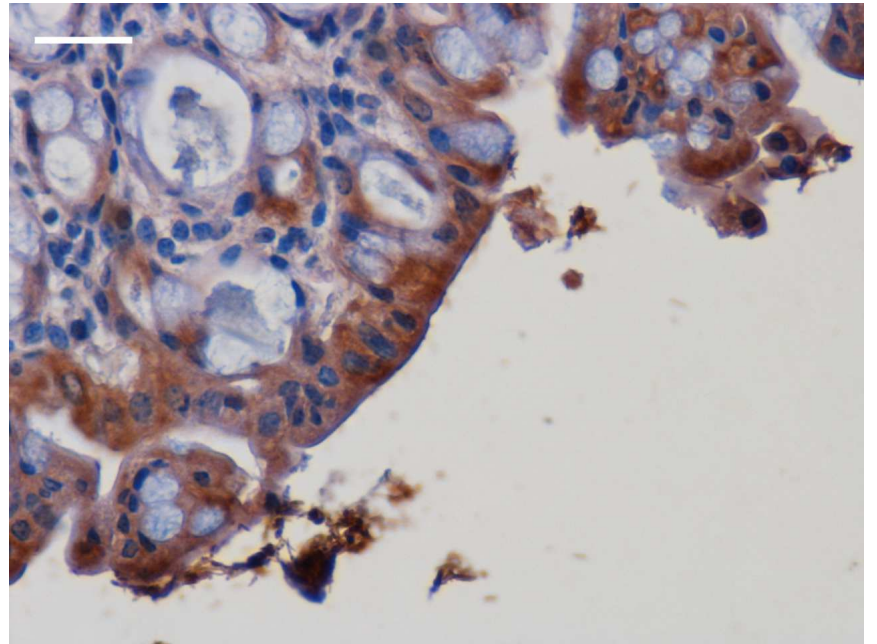



# Supplementary Figure 3b

Colon Submucosa  
(Gr. IV, DSS 1.5% + InvColi<sup>NC</sup>)

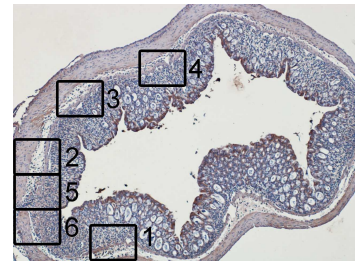

- Epithelial cell
- Granulocyte
- Monocyte/Macrophage
- Macrophage
- Lymphocyte
- Plasma cell

1

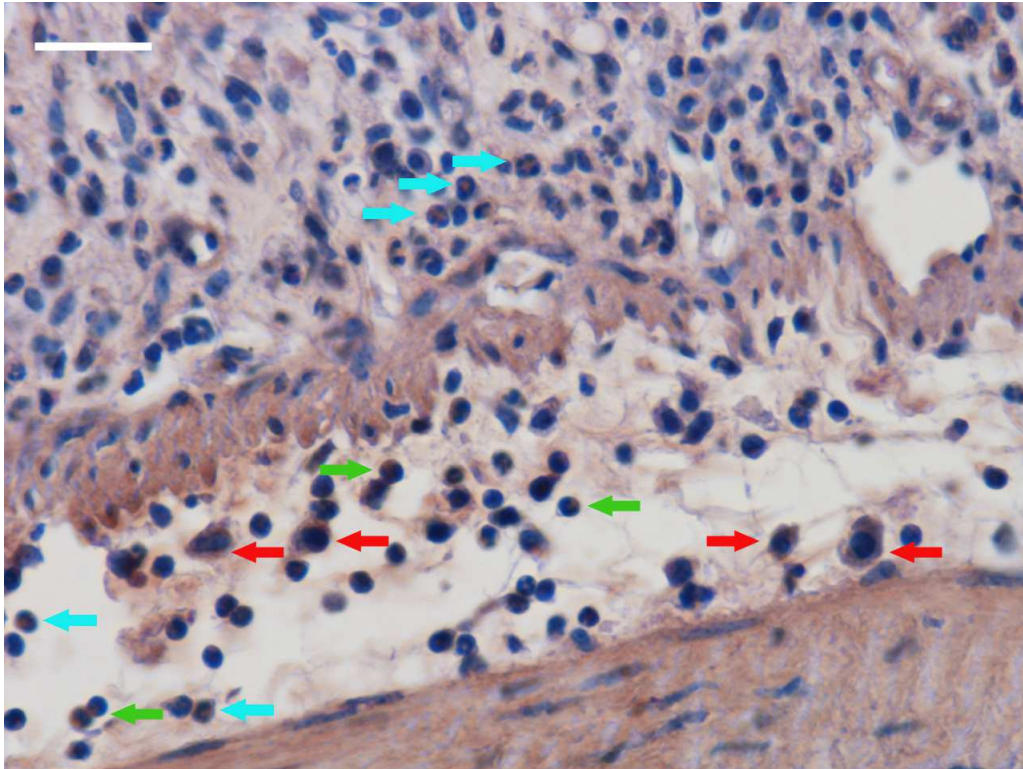

2

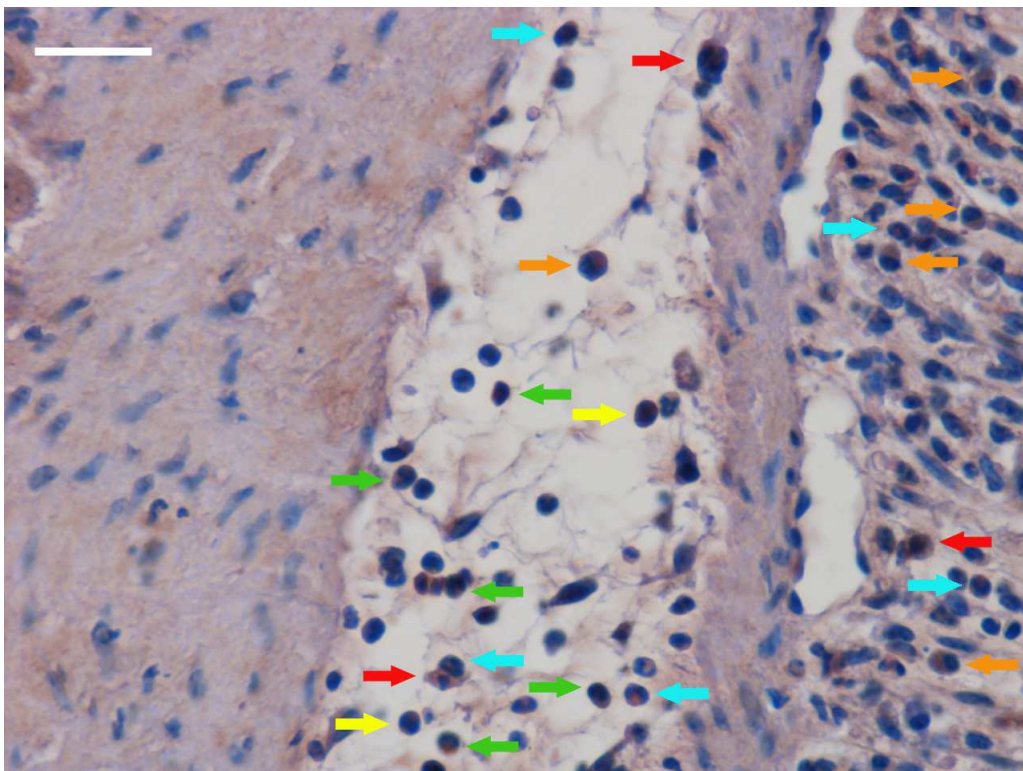



3

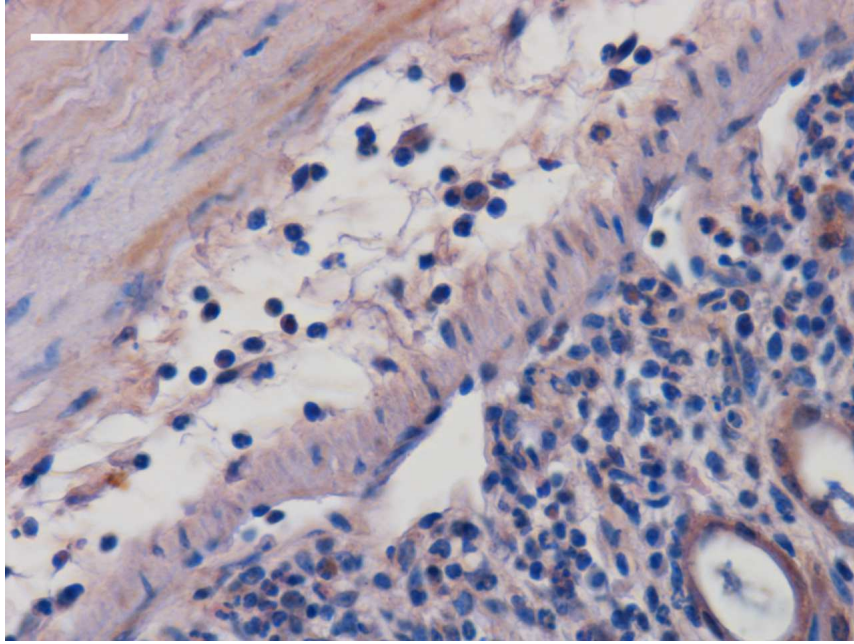

4

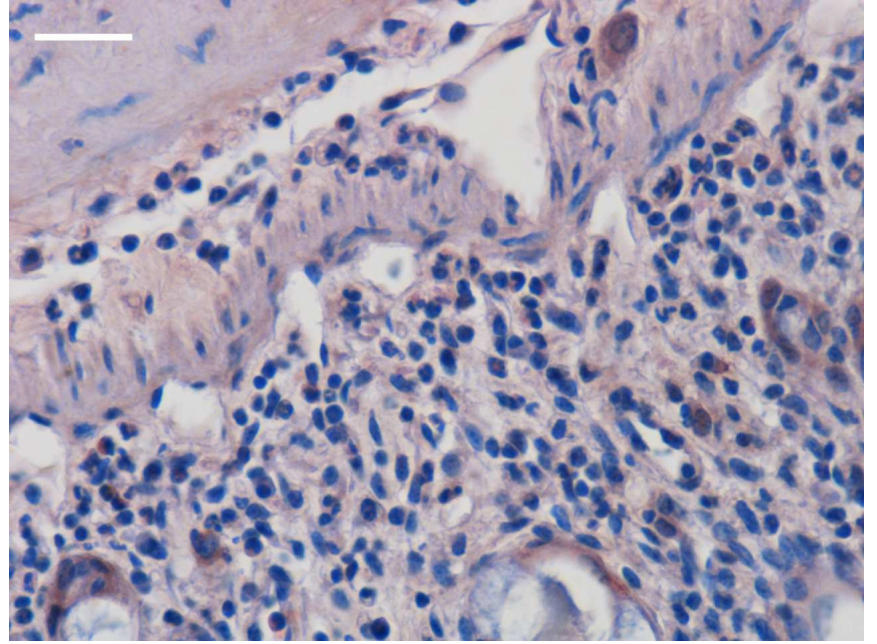

5

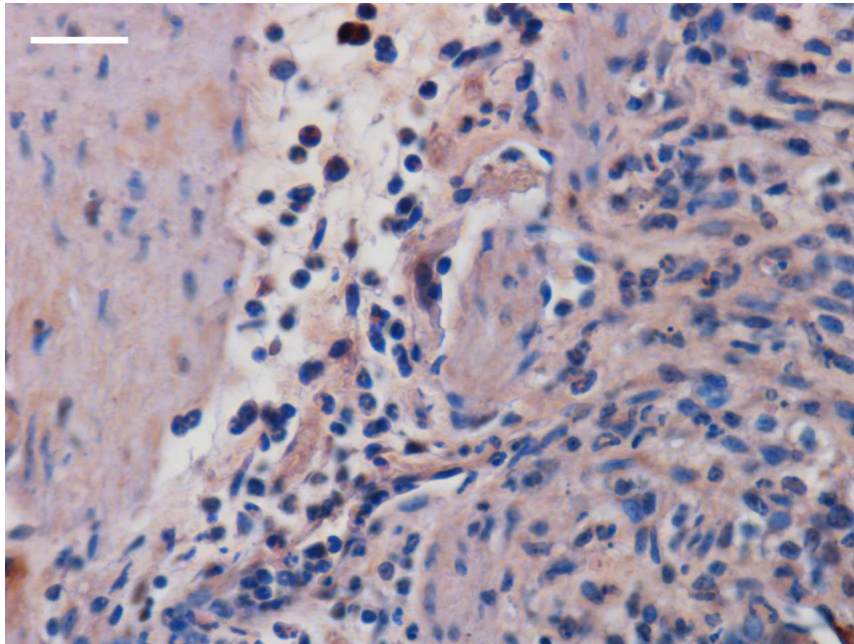

6

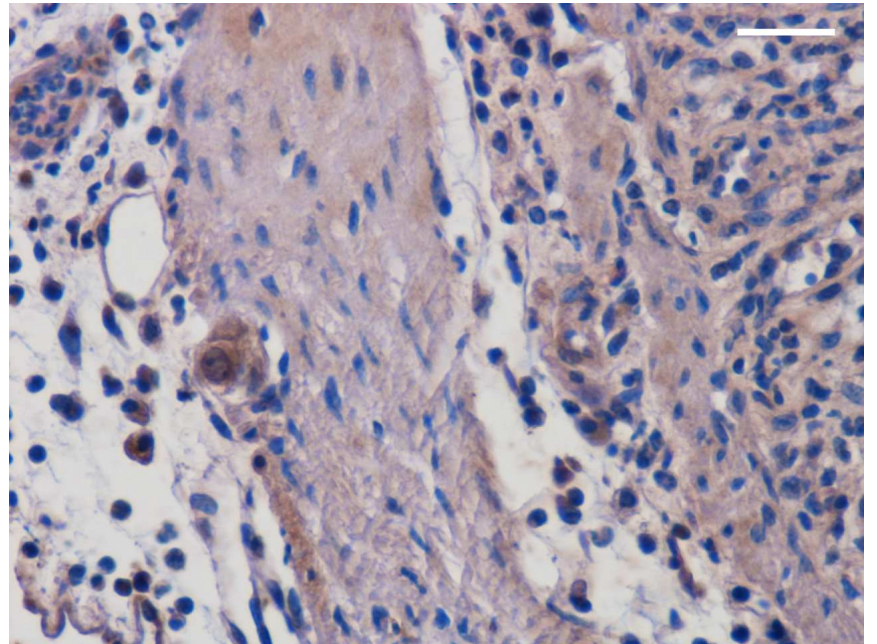

**Supplementary Figure S3** – Colon cells express GFP after InvColi<sup>NC</sup> invasion/transfection.

High-magnification images from Figure 1d, representing GFP protein expression evaluated by immunohistochemistry in a FFPE colon specimen from experimental mice group *IV* (DSS 1.5% + InvColi<sup>NC</sup>). **(a)** IHC images from colon mucosa. **(b)** IHC images from colon submucosa. Scale bar = 25  $\mu$ m;  $\times$ 400 magnification. **(1,2)** Arrows indicate the different type of transfected cells expressing GFP, localized in colon mucosa or submucosa.
