# Supplementary material
Source: PubMed Central journal article supplement (PMC4445621)
Supplement: mt2014222x4.pdf [file mt2014222x4.pdf]

# Supplementary Figure 4

a

| $\Delta$ weight % (mean)  |      |       |       |        |        |        |        |        |       |       |       |       |       |       |       |
|---------------------------|------|-------|-------|--------|--------|--------|--------|--------|-------|-------|-------|-------|-------|-------|-------|
| Experimental days         | D7   | D8    | D9    | D10    | D11    | D12    | D13    | D14    | D15   | D16   | D17   | D18   | D19   | D20   | D21   |
| NO DSS + vehicle          | 0,00 | 0,76  | 0,77  | 0,77   | 1,76   | 3,13   | 3,35   | 3,74   | 3,74  | 4,89  | 5,08  | 5,08  | 5,67  | 6,08  | 5,29  |
| NO DSS + InvColi-shCOX2   | 0,00 | 1,49  | 1,70  | 3,10   | 2,94   | 3,97   | 5,85   | 7,22   | 8,48  | 9,10  | 9,53  | 10,15 | 9,92  | 9,88  | 8,04  |
| DSS 1.5% + vehicle        | 0,00 | -4,19 | -7,68 | -12,09 | -19,26 | -17,94 | -18,53 | -16,40 | -7,32 | -4,13 | -1,98 | 0,02  | 0,63  | 0,38  | -0,78 |
| DSS 1.5% + InvColi-NC     | 0,00 | -6,00 | -5,85 | -10,69 | -15,50 | -14,83 | -10,83 | -7,10  | -6,85 | -7,07 | -3,64 | -3,42 | -2,96 | -2,51 | -0,45 |
| DSS 1.5% + InvColi-shCOX2 | 0,00 | -2,60 | -2,93 | -6,98  | -6,74  | -10,90 | -16,00 | -11,95 | -9,25 | -6,87 | -4,84 | -1,96 | 0,40  | 1,21  | 1,99  |

b

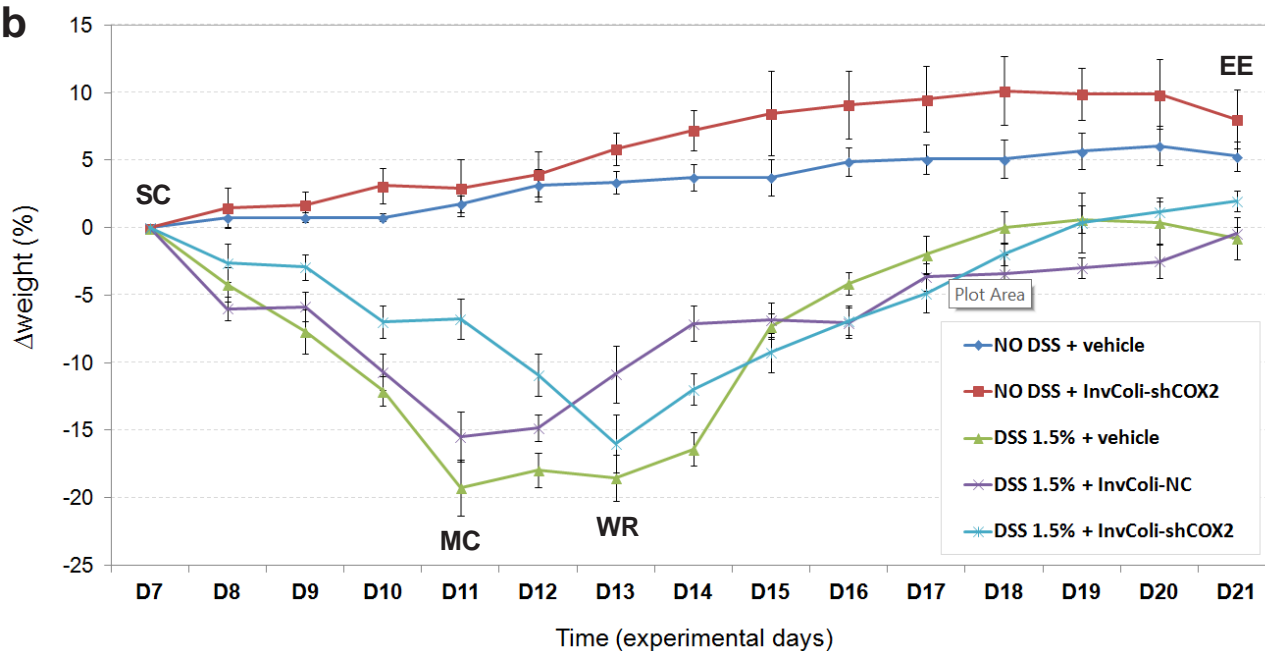

c

| Scores weight loss (mean $\pm$ SD) |               |               |               |               |               |               |               |               |               |               |               |               |               |               |               |
|------------------------------------|---------------|---------------|---------------|---------------|---------------|---------------|---------------|---------------|---------------|---------------|---------------|---------------|---------------|---------------|---------------|
| Experimental days                  | D7            | D8            | D9            | D10           | D11           | D12           | D13           | D14           | D15           | D16           | D17           | D18           | D19           | D20           | D21           |
| NO DSS + vehicle                   | 0,0 $\pm$ 0,0 |
| NO DSS + InvColi-shCOX2            | 0,0 $\pm$ 0,0 |
| DSS 1.5% + vehicle                 | 0,0 $\pm$ 0,0 | 0,8 $\pm$ 0,5 | 1,5 $\pm$ 0,7 | 2,4 $\pm$ 0,4 | 3,9 $\pm$ 0,8 | 3,6 $\pm$ 0,5 | 3,7 $\pm$ 0,7 | 3,3 $\pm$ 0,5 | 1,5 $\pm$ 0,2 | 0,8 $\pm$ 0,2 | 0,4 $\pm$ 0,3 | 0,0 $\pm$ 0,3 | 0,0 $\pm$ 0,1 | 0,0 $\pm$ 0,3 | 0,2 $\pm$ 0,4 |
| DSS 1.5% + InvColi-NC              | 0,0 $\pm$ 0,0 | 1,2 $\pm$ 0,3 | 1,2 $\pm$ 0,4 | 2,1 $\pm$ 0,5 | 3,1 $\pm$ 0,7 | 3,0 $\pm$ 0,4 | 2,2 $\pm$ 0,8 | 1,4 $\pm$ 0,5 | 1,4 $\pm$ 0,3 | 1,4 $\pm$ 0,2 | 0,7 $\pm$ 0,2 | 0,7 $\pm$ 0,6 | 0,6 $\pm$ 0,3 | 0,5 $\pm$ 0,5 | 0,1 $\pm$ 0,2 |
| DSS 1.5% + InvColi-shCOX2          | 0,0 $\pm$ 0,0 | 0,5 $\pm$ 0,6 | 0,6 $\pm$ 0,4 | 1,4 $\pm$ 0,5 | 1,3 $\pm$ 0,6 | 2,2 $\pm$ 0,6 | 3,2 $\pm$ 0,9 | 2,4 $\pm$ 0,5 | 1,9 $\pm$ 0,3 | 1,4 $\pm$ 0,2 | 1,0 $\pm$ 0,3 | 0,4 $\pm$ 0,3 | 0,0 $\pm$ 0,5 | 0,0 $\pm$ 0,0 | 0,0 $\pm$ 0,0 |

| Scores stool consistency (mean $\pm$ SD) |               |               |               |               |               |               |               |               |               |               |               |               |               |               |               |
|------------------------------------------|---------------|---------------|---------------|---------------|---------------|---------------|---------------|---------------|---------------|---------------|---------------|---------------|---------------|---------------|---------------|
| Experimental days                        | D7            | D8            | D9            | D10           | D11           | D12           | D13           | D14           | D15           | D16           | D17           | D18           | D19           | D20           | D21           |
| NO DSS + vehicle                         | 0,0 $\pm$ 0,0 |
| NO DSS + InvColi-shCOX2                  | 0,0 $\pm$ 0,0 |
| DSS 1.5% + vehicle                       | 2,5 $\pm$ 0,5 | 2,5 $\pm$ 0,5 | 3,0 $\pm$ 0,0 | 2,0 $\pm$ 0,5 | 1,0 $\pm$ 1,0 | 0,0 $\pm$ 0,0 | 0,0 $\pm$ 0,0 | 0,0 $\pm$ 0,0 | 0,0 $\pm$ 0,0 |
| DSS 1.5% + InvColi-NC                    | 2,0 $\pm$ 0,5 | 2,0 $\pm$ 0,0 | 2,5 $\pm$ 0,5 | 3,0 $\pm$ 0,0 | 3,0 $\pm$ 0,0 | 2,5 $\pm$ 0,0 | 2,0 $\pm$ 0,5 | 2,0 $\pm$ 0,5 | 2,0 $\pm$ 0,5 | 2,0 $\pm$ 0,5 | 1,0 $\pm$ 1,0 | 0,0 $\pm$ 0,0 | 0,0 $\pm$ 0,0 | 0,0 $\pm$ 0,0 | 0,0 $\pm$ 0,0 |
| DSS 1.5% + InvColi-shCOX2                | 2,0 $\pm$ 0,5 | 2,0 $\pm$ 0,0 | 2,0 $\pm$ 0,5 | 1,5 $\pm$ 0,5 | 2,0 $\pm$ 0,0 | 2,0 $\pm$ 0,0 | 1,5 $\pm$ 0,5 | 2,0 $\pm$ 0,5 | 2,0 $\pm$ 0,5 | 2,0 $\pm$ 0,5 | 1,5 $\pm$ 0,0 | 0,5 $\pm$ 0,5 | 0,0 $\pm$ 0,0 | 0,0 $\pm$ 0,0 | 0,0 $\pm$ 0,0 |

| Scores bleeding (mean $\pm$ SD) |               |               |               |               |               |               |               |               |               |               |               |               |               |               |               |
|---------------------------------|---------------|---------------|---------------|---------------|---------------|---------------|---------------|---------------|---------------|---------------|---------------|---------------|---------------|---------------|---------------|
| Experimental days               | D7            | D8            | D9            | D10           | D11           | D12           | D13           | D14           | D15           | D16           | D17           | D18           | D19           | D20           | D21           |
| NO DSS + vehicle                | 0,0 $\pm$ 0,0 |
| NO DSS + InvColi-shCOX2         | 0,0 $\pm$ 0,0 |
| DSS 1.5% + vehicle              | 2,0 $\pm$ 1,0 | 2,0 $\pm$ 1,0 | 2,0 $\pm$ 1,0 | 2,0 $\pm$ 0,5 | 3,0 $\pm$ 0,0 | 3,0 $\pm$ 0,0 | 2,0 $\pm$ 0,5 | 2,0 $\pm$ 0,5 | 2,0 $\pm$ 0,0 | 2,0 $\pm$ 0,0 | 1,0 $\pm$ 0,5 | 0,0 $\pm$ 0,0 | 0,0 $\pm$ 0,0 | 0,0 $\pm$ 0,0 | 0,0 $\pm$ 0,0 |
| DSS 1.5% + InvColi-NC           | 2,0 $\pm$ 0,5 | 2,0 $\pm$ 0,0 | 2,0 $\pm$ 0,5 | 2,0 $\pm$ 1,0 | 2,5 $\pm$ 0,5 | 2,5 $\pm$ 0,5 | 2,0 $\pm$ 0,5 | 2,0 $\pm$ 0,5 | 2,0 $\pm$ 0,5 | 1,5 $\pm$ 0,5 | 0,5 $\pm$ 0,5 | 0,0 $\pm$ 0,0 | 0,0 $\pm$ 0,0 | 0,0 $\pm$ 0,0 | 0,0 $\pm$ 0,0 |
| DSS 1.5% + InvColi-shCOX2       | 2,0 $\pm$ 0,5 | 2,0 $\pm$ 0,5 | 2,0 $\pm$ 0,0 | 1,5 $\pm$ 0,5 | 1,5 $\pm$ 0,5 | 1,5 $\pm$ 0,5 | 1,0 $\pm$ 1,0 | 1,5 $\pm$ 0,0 | 1,0 $\pm$ 0,5 | 1,0 $\pm$ 0,0 | 0,0 $\pm$ 0,0 |

## Supplementary Figure S4

(a) Numeric value and (b) graphical representation of  $\Delta$ weight percentages calculated for all experimental mice groups during the experiment (from time D7 to D21). For each group, values were considered as mean of  $\Delta$ weight (%) calculated on each subject from the same group. Graph represents mean  $\pm$  SD. SC = start colitis; MC = maximum colitis; WR = weight recovery; EE = end of the experiment. (c) Score values (mean  $\pm$  SD) used for DAI calculation (weight loss + stool consistency + bleeding).
